# Supplementary material for: Comparative genomics of Steinernema reveals deeply conserved gene regulatory networks
Source: Springer Nature journal article supplement (doi:10.1186/s13059-015-0746-6), 2015-09-21
Supplement: 13059_2015_746_MOESM2_ESM.pdf [file 13059_2015_746_MOESM2_ESM.pdf]

| Species               | Total proteins<br>in analysis | Proteins<br>clustered | Orphan<br>proteins | % orphans |
|-----------------------|-------------------------------|-----------------------|--------------------|-----------|
| <i>S. carpocapsae</i> | 28,313                        | 17,653                | 10,660             | 37.89     |
| <i>B. xylophilus</i>  | 18,074                        | 12,420                | 5,654              | 31.28     |
| <i>P. redivivus</i>   | 24,249                        | 17,527                | 6,722              | 27.72     |
| <i>C. elegans</i>     | 20,426                        | 15,930                | 4,496              | 22.01     |
| <i>P. pacificus</i>   | 24,217                        | 15,042                | 9,175              | 37.89     |
| <i>A. suum</i>        | 18,842                        | 10,926                | 7,616              | 41.07     |
| <i>B. malayi</i>      | 21,332                        | 16,066                | 5,266              | 24.69     |
| <i>T. spiralis</i>    | 16,380                        | 11,066                | 5,314              | 32.44     |
| <i>M. hapla</i>       | 13,072                        | 8,889                 | 4,183              | 32.00     |
| <i>N. vitripennis</i> | 18,822                        | 15,112                | 3,710              | 19.71     |

**Table S1.** Cluster analysis of orphan proteins.

| Species               | # of CEGMA protein orthologs | % of CEGMA orthologs in assembly |
|-----------------------|------------------------------|----------------------------------|
| <i>S. carpocapsae</i> | 445                          | 98.02%                           |
| <i>S. feltiae</i>     | 443                          | 97.58%                           |
| <i>S. glaseri</i>     | 440                          | 96.92%                           |
| <i>S. monticolum</i>  | 437                          | 96.26%                           |
| <i>S. scapterisci</i> | 441                          | 97.14%                           |

**Table S2.** Predicted *Steinernema* genome completeness using CEGMA.

|                 | No. of <i>S. carpocapsae</i> transcripts (31,944) | No. of <i>S. scapterisci</i> transcripts (33,149) | No. of <i>S. feltiae</i> transcripts (36,434) | No. of <i>S. glaseri</i> transcripts (37,120) | No. of <i>S. monticolum</i> transcripts (38,381) |
|-----------------|---------------------------------------------------|---------------------------------------------------|-----------------------------------------------|-----------------------------------------------|--------------------------------------------------|
| Full support    | 10,408                                            | 4,338                                             | 5,971                                         | 4,499                                         | 5,708                                            |
| Partial support | 15,297                                            | 15,811                                            | 16,184                                        | 14,783                                        | 14,359                                           |
| No support      | 6,239                                             | 13,000                                            | 14,279                                        | 17,838                                        | 18,314                                           |

|                 | No. of <i>S. carpocapsae</i> transcripts (31,944) | No. of <i>S. scapterisci</i> transcripts (33,149) | No. of <i>S. feltiae</i> transcripts (36,434) | No. of <i>S. glaseri</i> transcripts (37,120) | No. of <i>S. monticolum</i> transcripts (38,381) |
|-----------------|---------------------------------------------------|---------------------------------------------------|-----------------------------------------------|-----------------------------------------------|--------------------------------------------------|
| Full support    | 32.6%                                             | 13.0%                                             | 16.4%                                         | 12.1%                                         | 14.9%                                            |
| Partial support | 47.9%                                             | 47.7%                                             | 44.4%                                         | 39.8%                                         | 37.4%                                            |
| No support      | 19.5%                                             | 39.2%                                             | 39.2%                                         | 48.1%                                         | 47.7%                                            |

**Table S3.** Number and percentage of *S. carpocapsae*, *S. scapterisci*, *S. feltiae*, *S. glaseri*, and *S. monticolum* transcripts that are fully, partially, or not supported by RNA-seq reads. Four RNA-seq data sets (embryo, L1, IJ, and adult) contribute to the transcript support for *S. carpocapsae*, while only single IJ RNA-seq data sets contribute to the transcript support for all the other *Steinernema* species.

| Type of Proteases                | Scar       | Ssca       | Sfel       | Sgla       | Smon       | Bxyl       | Pred       | Cele       | Ppac       |
|----------------------------------|------------|------------|------------|------------|------------|------------|------------|------------|------------|
| Aspartic                         | 41         | 66         | 40         | 39         | 67         | 78         | 24         | 27         | 38         |
| Cysteine                         | 124        | 147        | 147        | 116        | 122        | 148        | 112        | 141        | 100        |
| Metallo                          | 214        | 268        | 306        | 314        | 307        | 209        | 232        | 203        | 215        |
| Serine                           | 246        | 347        | 301        | 253        | 349        | 174        | 227        | 156        | 237        |
| Threonine                        | 27         | 36         | 34         | 29         | 32         | 21         | 21         | 23         | 22         |
| Unassigned                       | 2          | 7          | 4          | 5          | 4          | 1          | 1          | 1          | 1          |
| <b>Total Proteases</b>           | <b>654</b> | <b>871</b> | <b>831</b> | <b>756</b> | <b>881</b> | <b>631</b> | <b>617</b> | <b>551</b> | <b>613</b> |
| <b>Total Protease inhibitors</b> | <b>146</b> | <b>175</b> | <b>214</b> | <b>133</b> | <b>153</b> | <b>60</b>  | <b>91</b>  | <b>94</b>  | <b>64</b>  |

**Table S4.** Protease abundance summary.

| Subdivisions             | Scar | Ssca | Sfel | Sgla | Smon | Bxyl | Pred | Cele | Ppac |
|--------------------------|------|------|------|------|------|------|------|------|------|
| A1A (A01A)               | 34   | 60   | 32   | 34   | 56   | 72   | 19   | 22   | 32   |
| A8                       | 0    | 0    | 1    | 0    | 0    | 0    | 0    | 0    | 0    |
| A11A                     | 0    | 0    | 0    | 0    | 0    | 0    | 0    | 0    | 0    |
| A11X                     | 3    | 1    | 2    | 0    | 7    | 1    | 1    | 0    | 0    |
| A22A                     | 2    | 2    | 2    | 3    | 2    | 3    | 2    | 3    | 4    |
| A22B                     | 2    | 3    | 2    | 2    | 2    | 2    | 2    | 2    | 2    |
| A24A                     | 0    | 0    | 1    | 0    | 0    | 0    | 0    | 0    | 0    |
| Total aspartic proteases | 41   | 66   | 40   | 39   | 67   | 78   | 24   | 27   | 38   |

**Table S5.** Aspartic protease abundance.

| Subdivisions             | Scar | Ssca | Sfel | Sgla | Smon | Bxyl | Pred | Cele | Ppac |
|--------------------------|------|------|------|------|------|------|------|------|------|
| C1A (C01A)               | 46   | 53   | 57   | 18   | 37   | 66   | 38   | 31   | 27   |
| C2A                      | 6    | 6    | 6    | 7    | 6    | 6    | 6    | 13   | 5    |
| C11                      | 0    | 0    | 0    | 0    | 0    | 0    | 0    | 0    | 0    |
| C12                      | 2    | 1    | 3    | 3    | 4    | 3    | 0    | 4    | 2    |
| C13                      | 4    | 4    | 7    | 6    | 8    | 16   | 6    | 2    | 3    |
| C14A                     | 1    | 5    | 1    | 3    | 1    | 2    | 2    | 4    | 1    |
| C14B                     | 1    | 1    | 1    | 1    | 1    | 1    | 1    | 1    | 1    |
| C15                      | 1    | 2    | 1    | 0    | 1    | 1    | 1    | 3    | 0    |
| C19                      | 22   | 24   | 27   | 28   | 21   | 22   | 23   | 38   | 24   |
| C26                      | 3    | 5    | 3    | 6    | 3    | 2    | 2    | 2    | 2    |
| C39                      | 0    | 0    | 0    | 0    | 1    | 0    | 0    | 0    | 0    |
| C40                      | 0    | 0    | 0    | 1    | 1    | 0    | 0    | 0    | 0    |
| C44                      | 7    | 8    | 7    | 11   | 9    | 8    | 5    | 8    | 5    |
| C46                      | 8    | 8    | 7    | 5    | 5    | 3    | 6    | 10   | 10   |
| C48                      | 4    | 4    | 4    | 6    | 3    | 5    | 4    | 4    | 5    |
| C50                      | 2    | 3    | 2    | 4    | 4    | 1    | 1    | 2    | 0    |
| C54                      | 2    | 2    | 3    | 2    | 2    | 2    | 4    | 2    | 1    |
| C56                      | 3    | 5    | 2    | 3    | 4    | 2    | 2    | 3    | 1    |
| C64                      | 1    | 2    | 3    | 2    | 2    | 2    | 1    | 1    | 1    |
| C65                      | 1    | 2    | 2    | 1    | 1    | 1    | 1    | 1    | 1    |
| C67                      | 1    | 0    | 2    | 1    | 1    | 0    | 0    | 1    | 0    |
| C74                      | 1    | 1    | 2    | 0    | 1    | 0    | 1    | 1    | 0    |
| C78                      | 1    | 1    | 1    | 2    | 1    | 1    | 1    | 1    | 1    |
| C80                      | 0    | 1    | 0    | 0    | 0    | 0    | 0    | 0    | 0    |
| C83                      | 1    | 1    | 1    | 1    | 1    | 0    | 0    | 1    | 1    |
| C85                      | 1    | 3    | 1    | 1    | 1    | 1    | 2    | 2    | 0    |
| C86                      | 4    | 4    | 1    | 3    | 2    | 2    | 2    | 2    | 2    |
| C89                      | 1    | 1    | 2    | 1    | 1    | 1    | 3    | 3    | 7    |
| Total cysteine proteases | 124  | 147  | 146  | 116  | 122  | 148  | 148  | 141  | 100  |

**Table S6.** Cysteine protease abundance.

| Subdivisions              | Scar | Ssca | Sfel | Sgla | Smon | Bxyl | Pred | Cele | Ppac |
|---------------------------|------|------|------|------|------|------|------|------|------|
| T01A                      | 19   | 22   | 21   | 16   | 16   | 14   | 11   | 14   | 12   |
| T01B                      | 0    | 0    | 0    | 1    | 0    | 0    | 0    | 0    | 0    |
| T01X                      | 0    | 0    | 0    | 0    | 0    | 0    | 1    | 0    | 0    |
| T02                       | 2    | 2    | 2    | 1    | 3    | 2    | 2    | 3    | 1    |
| T03                       | 6    | 10   | 11   | 9    | 12   | 5    | 7    | 6    | 9    |
| T05                       | 0    | 0    | 0    | 2    | 1    | 0    | 0    | 0    | 0    |
| T06                       | 0    | 2    | 0    | 0    | 0    | 0    | 0    | 0    | 0    |
| Total threonine proteases | 27   | 36   | 34   | 29   | 32   | 21   | 21   | 23   | 22   |

**Table S7.** Threonine protease abundance.

| Subdivisions                       | Scar | Ssca | Sfel | Sgla | Smon | Bxyl | Pred | Cele | Ppac |
|------------------------------------|------|------|------|------|------|------|------|------|------|
| M01                                | 27   | 24   | 26   | 16   | 20   | 26   | 27   | 15   | 17   |
| M02                                | 1    | 1    | 1    | 1    | 2    | 1    | 1    | 0    | 1    |
| M03A                               | 2    | 7    | 3    | 3    | 4    | 3    | 3    | 2    | 4    |
| M08                                | 1    | 1    | 2    | 2    | 1    | 2    | 1    | 0    | 1    |
| M10A                               | 9    | 8    | 8    | 15   | 21   | 6    | 7    | 7    | 6    |
| M12A                               | 37   | 54   | 103  | 106  | 78   | 25   | 37   | 39   | 53   |
| M12B                               | 10   | 10   | 11   | 12   | 9    | 10   | 11   | 11   | 14   |
| M13                                | 20   | 21   | 22   | 23   | 26   | 64   | 65   | 31   | 28   |
| M14A                               | 26   | 23   | 19   | 16   | 24   | 10   | 12   | 9    | 9    |
| M14B                               | 4    | 4    | 6    | 3    | 4    | 4    | 5    | 4    | 4    |
| M14X                               | 1    | 1    | 1    | 2    | 1    | 1    | 1    | 1    | 0    |
| M15A                               | 0    | 0    | 0    | 0    | 0    | 0    | 0    | 0    | 0    |
| M15B                               | 0    | 0    | 0    | 0    | 0    | 0    | 0    | 0    | 0    |
| M15C                               | 0    | 0    | 0    | 0    | 0    | 0    | 0    | 0    | 0    |
| M15D                               | 0    | 0    | 0    | 0    | 0    | 0    | 0    | 0    | 0    |
| M16A                               | 16   | 32   | 12   | 21   | 3    | 0    | 0    | 15   | 3    |
| M16B                               | 4    | 5    | 9    | 6    | 10   | 7    | 10   | 11   | 13   |
| M16C                               | 2    | 3    | 3    | 3    | 3    | 2    | 2    | 1    | 1    |
| M17                                | 2    | 3    | 3    | 4    | 4    | 2    | 2    | 2    | 5    |
| M18                                | 1    | 1    | 2    | 1    | 2    | 1    | 2    | 1    | 1    |
| M19                                | 0    | 0    | 0    | 0    | 2    | 0    | 0    | 0    | 0    |
| M20A                               | 5    | 6    | 10   | 8    | 11   | 7    | 4    | 7    | 7    |
| M20B                               | 0    | 0    | 0    | 0    | 1    | 0    | 0    | 0    | 0    |
| M20C                               | 0    | 1    | 0    | 0    | 1    | 0    | 0    | 0    | 0    |
| M20D                               | 0    | 1    | 0    | 1    | 3    | 0    | 0    | 0    | 0    |
| M20X                               | 0    | 0    | 0    | 1    | 0    | 0    | 0    | 0    | 0    |
| M22                                | 2    | 6    | 4    | 4    | 3    | 3    | 2    | 3    | 2    |
| M23B                               | 2    | 7    | 1    | 5    | 4    | 0    | 1    | 4    | 1    |
| Total table S8<br>metalloproteases | 172  | 219  | 246  | 253  | 236  | 174  | 193  | 163  | 170  |

**Table S8.** Metallo-protease abundance part I.



| Subdivisions                    | Scar | Ssca | Sfel | Sgla | Smon | Bxyl | Pred | Cele | Ppac |
|---------------------------------|------|------|------|------|------|------|------|------|------|
| M24A                            | 2    | 2    | 3    | 4    | 6    | 2    | 3    | 4    | 2    |
| M24B                            | 5    | 6    | 7    | 7    | 8    | 4    | 4    | 4    | 5    |
| M24X                            | 2    | 2    | 5    | 3    | 4    | 2    | 2    | 2    | 3    |
| M28A                            | 1    | 1    | 2    | 1    | 2    | 1    | 0    | 1    | 0    |
| M28B                            | 6    | 6    | 9    | 5    | 8    | 3    | 6    | 3    | 4    |
| M28E                            | 0    | 0    | 0    | 0    | 0    | 0    | 0    | 0    | 0    |
| M28X                            | 3    | 3    | 4    | 3    | 3    | 2    | 6    | 3    | 3    |
| M38                             | 5    | 7    | 8    | 14   | 16   | 6    | 5    | 6    | 6    |
| M41                             | 4    | 4    | 4    | 4    | 4    | 4    | 3    | 6    | 2    |
| M43B                            | 0    | 0    | 0    | 0    | 0    | 0    | 1    | 0    | 0    |
| M48A                            | 1    | 1    | 1    | 1    | 1    | 1    | 1    | 1    | 3    |
| M48B                            | 0    | 0    | 0    | 1    | 0    | 0    | 0    | 0    | 0    |
| M48X                            | 0    | 3    | 1    | 4    | 2    | 0    | 0    | 0    | 0    |
| M49                             | 1    | 1    | 1    | 1    | 1    | 1    | 1    | 1    | 5    |
| M50                             | 0    | 0    | 0    | 0    | 0    | 0    | 0    | 0    | 0    |
| M50A                            | 1    | 1    | 2    | 0    | 1    | 2    | 2    | 2    | 2    |
| M50B                            | 0    | 0    | 0    | 2    | 0    | 0    | 0    | 0    | 0    |
| M61                             | 0    | 0    | 0    | 0    | 1    | 0    | 0    | 0    | 0    |
| M67A                            | 7    | 6    | 6    | 8    | 8    | 5    | 4    | 5    | 8    |
| M67C                            | 0    | 1    | 2    | 0    | 1    | 0    | 0    | 0    | 0    |
| M67X                            | 4    | 5    | 4    | 3    | 4    | 2    | 1    | 2    | 2    |
| M75                             | 0    | 0    | 1    | 0    | 1    | 0    | 0    | 0    | 0    |
| Total table S8 metalloproteases | 42   | 49   | 60   | 61   | 71   | 35   | 39   | 40   | 45   |
| Total table S9 metalloproteases | 172  | 219  | 246  | 253  | 236  | 174  | 193  | 163  | 170  |
| Total metalloproteases          | 214  | 268  | 306  | 314  | 307  | 209  | 232  | 203  | 215  |

**Table S9.** Metallo-protease abundance part II.

| Subdivisions                        | Scar | Ssca | Sfel | Sgla | Smon | Bxyl | Pred | Cele | Ppac |
|-------------------------------------|------|------|------|------|------|------|------|------|------|
| S01A                                | 82   | 127  | 98   | 94   | 119  | 4    | 57   | 5    | 26   |
| S01B                                | 0    | 0    | 0    | 1    | 1    | 0    | 0    | 0    | 0    |
| S01D                                | 0    | 0    | 0    | 0    | 0    | 0    | 0    | 0    | 0    |
| S01X                                | 1    | 1    | 2    | 1    | 1    | 1    | 2    | 2    | 2    |
| S08A                                | 3    | 4    | 1    | 3    | 4    | 6    | 12   | 1    | 2    |
| S08B                                | 4    | 4    | 5    | 8    | 5    | 3    | 7    | 4    | 4    |
| S08X                                | 0    | 0    | 0    | 0    | 1    | 0    | 0    | 0    | 0    |
| S09A                                | 2    | 6    | 3    | 4    | 4    | 1    | 2    | 0    | 2    |
| S09B                                | 2    | 2    | 2    | 2    | 6    | 2    | 4    | 3    | 4    |
| S09C                                | 3    | 2    | 2    | 2    | 4    | 5    | 2    | 2    | 4    |
| S09D                                | 0    | 0    | 0    | 0    | 0    | 0    | 0    | 0    | 0    |
| S09X                                | 60   | 66   | 59   | 47   | 53   | 63   | 69   | 61   | 71   |
| S10                                 | 21   | 27   | 16   | 19   | 26   | 29   | 18   | 21   | 65   |
| S11                                 | 2    | 1    | 0    | 0    | 2    | 0    | 0    | 0    | 0    |
| S12                                 | 9    | 10   | 13   | 8    | 15   | 6    | 8    | 9    | 8    |
| S13                                 | 0    | 1    | 0    | 2    | 2    | 0    | 0    | 0    | 0    |
| S14                                 | 1    | 5    | 1    | 2    | 3    | 1    | 1    | 1    | 1    |
| S15                                 | 0    | 0    | 0    | 0    | 1    | 0    | 0    | 0    | 0    |
| S16                                 | 2    | 3    | 39   | 8    | 30   | 2    | 3    | 9    | 1    |
| S24                                 | 0    | 5    | 1    | 2    | 1    | 0    | 0    | 0    | 0    |
| S26A                                | 18   | 43   | 12   | 4    | 9    | 2    | 2    | 2    | 1    |
| S26B                                | 1    | 1    | 1    | 1    | 1    | 1    | 1    | 1    | 2    |
| S26C                                | 0    | 0    | 0    | 0    | 1    | 0    | 0    | 0    | 0    |
| S28                                 | 16   | 16   | 13   | 13   | 29   | 25   | 20   | 15   | 20   |
| S33                                 | 12   | 14   | 18   | 17   | 16   | 18   | 12   | 14   | 15   |
| S41A                                | 0    | 0    | 0    | 2    | 4    | 0    | 0    | 0    | 0    |
| S45                                 | 0    | 0    | 0    | 2    | 0    | 0    | 0    | 0    | 0    |
| S46                                 | 0    | 0    | 0    | 0    | 1    | 0    | 0    | 0    | 0    |
| Total table S10<br>serine proteases | 239  | 338  | 286  | 242  | 339  | 169  | 220  | 150  | 228  |

**Table S10.** Serine protease abundance part I.

| Subdivisions                        | Scar | Ssca | Sfel | Sgla | Smon | Bxyl | Pred | Cele | Ppac |
|-------------------------------------|------|------|------|------|------|------|------|------|------|
| S49                                 | 0    | 1    | 2    | 0    | 2    | 0    | 0    | 0    | 0    |
| S54                                 | 6    | 6    | 8    | 7    | 5    | 3    | 5    | 4    | 7    |
| S58                                 | 0    | 0    | 0    | 0    | 0    | 0    | 0    | 0    | 0    |
| S59                                 | 1    | 1    | 1    | 2    | 1    | 1    | 1    | 1    | 1    |
| S63                                 | 0    | 0    | 4    | 1    | 2    | 1    | 1    | 0    | 1    |
| S66                                 | 0    | 0    | 0    | 1    | 0    | 0    | 0    | 0    | 0    |
| S72                                 | 0    | 0    | 0    | 0    | 0    | 0    | 0    | 1    | 0    |
| S73                                 | 0    | 1    | 0    | 0    | 0    | 0    | 0    | 0    | 0    |
| Total table S10<br>serine proteases | 7    | 9    | 15   | 11   | 10   | 5    | 7    | 6    | 9    |
| Total table S11<br>serine proteases | 239  | 338  | 286  | 242  | 339  | 169  | 220  | 150  | 228  |
| Total<br>serine proteases           | 246  | 347  | 301  | 253  | 349  | 174  | 227  | 156  | 237  |

**Table S11.** Serine protease abundance part II.

| Subdivisions              | Scar | Ssca | Sfel | Sgla | Smon | Bxyl | Pred | Cele | Ppac |
|---------------------------|------|------|------|------|------|------|------|------|------|
| I01                       | 1    | 1    | 2    | 0    | 1    | 0    | 1    | 1    | 0    |
| I02                       | 30   | 27   | 42   | 36   | 30   | 40   | 48   | 49   | 24   |
| I04                       | 18   | 34   | 63   | 16   | 39   | 3    | 4    | 7    | 9    |
| I08                       | 37   | 40   | 49   | 38   | 30   | 3    | 20   | 14   | 12   |
| I11                       | 0    | 1    | 0    | 0    | 0    | 0    | 0    | 0    | 0    |
| I21                       | 1    | 1    | 2    | 1    | 1    | 1    | 1    | 1    | 1    |
| I25B                      | 7    | 7    | 7    | 6    | 7    | 3    | 3    | 3    | 4    |
| I29                       | 3    | 1    | 2    | 1    | 0    | 1    | 2    | 2    | 0    |
| I31                       | 2    | 2    | 2    | 1    | 2    | 2    | 0    | 1    | 1    |
| I32                       | 1    | 1    | 1    | 1    | 0    | 1    | 2    | 2    | 1    |
| I33                       | 0    | 0    | 0    | 0    | 0    | 1    | 0    | 1    | 0    |
| I35                       | 1    | 1    | 0    | 0    | 2    | 0    | 0    | 1    | 2    |
| I39                       | 2    | 1    | 2    | 3    | 2    | 3    | 2    | 2    | 1    |
| I51                       | 7    | 5    | 3    | 5    | 3    | 2    | 2    | 2    | 4    |
| I63                       | 36   | 53   | 39   | 25   | 36   | 0    | 6    | 8    | 5    |
| Total protease inhibitors | 146  | 175  | 214  | 133  | 153  | 60   | 91   | 94   | 64   |

**Table S12.** Protease inhibitor abundance.

|                                        | Scar | Ssca | Sfel | Sgla | Smon | Bxyl | Pred | Cele | Ppac |
|----------------------------------------|------|------|------|------|------|------|------|------|------|
| FAR proteins                           | 41   | 42   | 43   | 54   | 38   | 9    | 5    | 8    | 19   |
| FAR proteins<br>with signal<br>peptide | 31   | 32   | 30   | 27   | 30   | 9    | 4    | 7    | 16   |
|                                        | Asum | Tspi | Bmal |      |      |      |      |      |      |
| FAR proteins                           | 4    | 0    | 3    |      |      |      |      |      |      |

**Table S13.** Fatty acid- and retinoid-binding protein abundance in *Steinernema* species.

| GEO accession | Species               | DNA or RNA | Developmental stage | Stranded or unstranded | Paired or single end reads | Read length (bp) | Sequencer           | Trimmed read length (bp) | Insert length (bp) | No. of reads (Million) |
|---------------|-----------------------|------------|---------------------|------------------------|----------------------------|------------------|---------------------|--------------------------|--------------------|------------------------|
| SRX1019157    | <i>S. carpocapsae</i> | RNA        | early embryo rep 1  | first-strand           | single                     | 75               | NextSeq 500         | 35                       | none               | 27.14                  |
| SRX1019158    | <i>S. carpocapsae</i> | RNA        | early embryo rep 2  | first-strand           | single                     | 75               | NextSeq 500         | 35                       | none               | 19.13                  |
| SRX1019159    | <i>S. carpocapsae</i> | RNA        | L1 rep 1            | first-strand           | single                     | 50               | Illumina HiSeq 2000 | 35                       | none               | 37.77                  |
| SRX1019160    | <i>S. carpocapsae</i> | RNA        | L1 rep 2            | first-strand           | single                     | 50               | Illumina HiSeq 2000 | 35                       | none               | 39.67                  |
| SRX1019161    | <i>S. carpocapsae</i> | RNA        | IJ rep 1            | first-strand           | single                     | 50               | Illumina HiSeq 2000 | 35                       | none               | 31.04                  |
| SRX1019162    | <i>S. carpocapsae</i> | RNA        | IJ rep 2            | first-strand           | single                     | 50               | Illumina HiSeq 2000 | 35                       | none               | 31.75                  |
| SRX1019163    | <i>S. carpocapsae</i> | RNA        | young adult rep 1   | first-strand           | single                     | 50               | Illumina HiSeq 2000 | 35                       | none               | 27.60                  |
| SRX1019164    | <i>S. carpocapsae</i> | RNA        | young adult rep 2   | first-strand           | single                     | 50               | Illumina HiSeq 2000 | 35                       | none               | 28.41                  |
| GEO accession | Species               | DNA or RNA | Developmental stage | Stranded or unstranded | Paired or single end reads | Read length (bp) | Sequencer           | Trimmed read length (bp) | Insert length (bp) | No. of reads (Million) |
| SRX1019165    | <i>S. feltiae</i>     | RNA        | early embryo rep 1  | first-strand           | single                     | 75               | NextSeq 500         | 35                       | none               | 16.85                  |
| SRX1019166    | <i>S. feltiae</i>     | RNA        | early embryo rep 2  | first-strand           | single                     | 75               | NextSeq 500         | 35                       | none               | 23.43                  |
| SRX1019168    | <i>S. feltiae</i>     | RNA        | L1 rep 1            | first-strand           | single                     | 75               | NextSeq 500         | 35                       | none               | 21.76                  |
| SRX1019169    | <i>S. feltiae</i>     | RNA        | L1 rep 2            | first-strand           | single                     | 75               | NextSeq 500         | 35                       | none               | 23.13                  |
| SRX1019170    | <i>S. feltiae</i>     | RNA        | IJ rep 1            | first-strand           | single                     | 75               | NextSeq 500         | 35                       | none               | 29.62                  |
| SRX1019171    | <i>S. feltiae</i>     | RNA        | IJ rep 2            | first-strand           | single                     | 75               | NextSeq 500         | 35                       | none               | 20.17                  |
| SRX1019172    | <i>S. feltiae</i>     | RNA        | young adult rep 1   | first-strand           | single                     | 75               | NextSeq 500         | 35                       | none               | 20.83                  |
| SRX1019173    | <i>S. feltiae</i>     | RNA        | young adult rep 2   | first-strand           | single                     | 75               | NextSeq 500         | 35                       | none               | 22.94                  |
| GEO accession | Species               | DNA or RNA | Developmental stage | Stranded or unstranded | Paired or single end reads | Read length (bp) | Sequencer           | Trimmed read length (bp) | Insert length (bp) | No. of reads (Million) |
| SRX1019174    | <i>C. elegans</i>     | RNA        | embryo rep 1        | first-strand           | single                     | 75               | NextSeq 500         | 35                       | none               | 22.79                  |
| SRX1019175    | <i>C. elegans</i>     | RNA        | embryo rep 2        | first-strand           | single                     | 75               | NextSeq 500         | 35                       | none               | 24.31                  |
| SRX1019176    | <i>C. elegans</i>     | RNA        | L1 rep 1            | first-strand           | single                     | 75               | NextSeq 500         | 35                       | none               | 20.94                  |
| SRX1019177    | <i>C. elegans</i>     | RNA        | L1 rep 2            | first-strand           | single                     | 75               | NextSeq 500         | 35                       | none               | 35.13                  |
| SRX1019178    | <i>C. elegans</i>     | RNA        | dauer rep 1         | first-strand           | single                     | 75               | NextSeq 500         | 35                       | none               | 42.04                  |
| SRX1019179    | <i>C. elegans</i>     | RNA        | dauer rep 2         | first-strand           | single                     | 75               | NextSeq 500         | 35                       | none               | 40.20                  |
| SRX1019180    | <i>C. elegans</i>     | RNA        | adult rep 1         | first-strand           | single                     | 75               | NextSeq 500         | 35                       | none               | 44.73                  |
| SRX1019181    | <i>C. elegans</i>     | RNA        | adult rep 2         | first-strand           | single                     | 75               | NextSeq 500         | 35                       | none               | 37.89                  |

**Table S14.** RNA library statistics for gene expression analysis.

|                                               | Total # 1:1 orthologs | Sum of 1:1s that are syntenic across scaffolds that have 2+ 1:1s | Sum of 1:1s that are syntenic across scaffolds that have 10+ 1:1s |
|-----------------------------------------------|-----------------------|------------------------------------------------------------------|-------------------------------------------------------------------|
| <i>S. scapterisci</i> – <i>S. carpocapsae</i> | 12,395                | 11,272                                                           | 6,576                                                             |
| <i>S. feltiae</i> – <i>S. carpocapsae</i>     | 10,228                | 8,188                                                            | 4,475                                                             |
| <i>S. monticolum</i> – <i>S. carpocapsae</i>  | 10,129                | 6,179                                                            | 331                                                               |
| <i>S. glaseri</i> – <i>S. carpocapsae</i>     | 9,731                 | 7,433                                                            | 2,337                                                             |

**Table S15.** Syntenic one-to-one orthologous genes in *Steinernema*.

|                                               | Max # of syntenic 1:1s on a scaffold | <i>S. carp</i> scaffold ID with the most 1:1s shared with another <i>Steinernema</i> scaffold | <i>Steinernema</i> scaffold ID with the most 1:1s shared with a <i>S. carp</i> scaffold | Total length of <i>S. carp</i> scaffold with most 1:1s (kb) | Total length of <i>Steinernema</i> scaffold with most 1:1s (kb) | Distance between outermost 1:1s on <i>S. carp</i> scaffold (kb) | Distance between outermost 1:1s on <i>Steinernema</i> scaffold (kb) | No. of non-syntenic/non-1:1s between outermost syntenic 1:1s in <i>S. carp</i> | No. of non-syntenic/non-1:1s between outermost syntenic 1:1s in <i>Steinernema</i> |
|-----------------------------------------------|--------------------------------------|-----------------------------------------------------------------------------------------------|-----------------------------------------------------------------------------------------|-------------------------------------------------------------|-----------------------------------------------------------------|-----------------------------------------------------------------|---------------------------------------------------------------------|--------------------------------------------------------------------------------|------------------------------------------------------------------------------------|
| <i>S. scapterisci</i> – <i>S. carpocapsae</i> | 103                                  | 1096                                                                                          | 2381                                                                                    | 994                                                         | 453                                                             | 374                                                             | 397                                                                 | 38                                                                             | 51                                                                                 |
| <i>S. feltiae</i> – <i>S. carpocapsae</i>     | 191                                  | 1189                                                                                          | 5455                                                                                    | 915                                                         | 1,446                                                           | 878                                                             | 794                                                                 | 89                                                                             | 82                                                                                 |
| <i>S. monticolum</i> – <i>S. carpocapsae</i>  | 20                                   | 1409                                                                                          | 8466                                                                                    | 1,136                                                       | 66                                                              | 108                                                             | 54                                                                  | 18                                                                             | 5                                                                                  |
| <i>S. glaseri</i> – <i>S. carpocapsae</i>     | 44                                   | 1250                                                                                          | 6476                                                                                    | 909                                                         | 288                                                             | 209                                                             | 245                                                                 | 17                                                                             | 49                                                                                 |

**Table S16.** Synteny statistics for *Steinernema* scaffolds with most syntenic orthologous genes.



| Motif No. | Web Logo | No. of <i>S. carpocapsae</i> gene neighbors | No. of <i>C. elegans</i> gene neighbors |   |
|-----------|----------|---------------------------------------------|-----------------------------------------|---|
| 1         |          | 1,882                                       | 1,274                                   | * |
| 2         |          | 2,662                                       | 4,879                                   | * |
| 3         |          | 3,156                                       | 4,594                                   | * |
| 4         |          | 3,831                                       | 2,527                                   | * |
| 5         |          | 944                                         | 769                                     |   |
| 6         |          | 556                                         | 2,120                                   |   |
| 7         |          | 1,412                                       | 680                                     | * |
| 8         |          | 989                                         | 5,114                                   |   |
| 9         |          | 426                                         | 677                                     | * |

| Motif No. | Web Logo | No. of <i>S. carpocapsae</i> gene neighbors | No. of <i>C. elegans</i> gene neighbors |   |
|-----------|----------|---------------------------------------------|-----------------------------------------|---|
| 10        |          | 1,755                                       | 5,461                                   | * |
| 11        |          | 1,033                                       | 810                                     | * |
| 12        |          | 1,531                                       | 19                                      | * |
| 13        |          | 1,277                                       | 2,931                                   | * |
| 14        |          | 3,147                                       | 4,437                                   | * |
| 15        |          | 2,111                                       | 2,525                                   | * |
| 16        |          | 994                                         | 3,861                                   |   |
| 17        |          | 613                                         | 2,446                                   | * |
| 18        |          | 334                                         | 1,394                                   | * |

| Motif No. | Web Logo                                                                           | No. of <i>S. carpocapsae</i> gene neighbors | No. of <i>C. elegans</i> gene neighbors |   |
|-----------|------------------------------------------------------------------------------------|---------------------------------------------|-----------------------------------------|---|
| 19        |   | 2,444                                       | 1,295                                   | * |
| 20        |   | 1,273                                       | 839                                     | * |
| 21        |   | 4,026                                       | 2,929                                   | * |
| 22        |   | 2,235                                       | 1,256                                   |   |
| 23        |   | 4,853                                       | 6,729                                   | * |
| 24        |   | 3,306                                       | 3,885                                   | * |
| 25        |   | 757                                         | 2,481                                   | * |
| 26        |   | 1,339                                       | 784                                     | * |
| 27        |  | 402                                         | 4,230                                   | * |

| Motif No. | Web Logo                                                                            | No. of <i>S. carpocapsae</i> gene neighbors | No. of <i>C. elegans</i> gene neighbors |   |
|-----------|-------------------------------------------------------------------------------------|---------------------------------------------|-----------------------------------------|---|
| 28        |  | 1,938                                       | 1,676                                   |   |
| 29        |  | 487                                         | 4,790                                   | * |
| 30        |  | 4,805                                       | 3,383                                   | * |

**Table S17.** Putative regulatory motifs discovered. The final set of putative regulatory motifs, their web logo sequences, and the number *S. carpocapsae* and *C. elegans* genes neighboring each motif. A red asterisk indicates that the motif matches one of more WormBase motifs ( $p$ -value  $< 1e^{-4}$  and  $e$ -value  $< 0.5$ ).

| Motif No. | Motif Match<br>(p-value < 1e <sup>-4</sup> and e-value < 0.5)          |
|-----------|------------------------------------------------------------------------|
| 1         | Y47D9A.1b.6_Stormo_2012, T06C10.2.8_Stormo_2012                        |
| 2         | M03F4.3a.4_Stormo_2012, Elemento_2005_motif_239, C36C9.4.3_Stormo_2012 |
| 3         | Y46E12BL.4.5_Stormo_2012                                               |
| 4         | Y40B10A.8.2_Stormo_2012, C04F2.1.3_Stormo_2012                         |
| 5         | No match                                                               |
| 6         | No match                                                               |
| 7         | C48E7.5.1_Stormo_2012, B0205.4.9_Stormo_2012, C54D2.4b.9_Stormo_2012   |
| 8         | No match                                                               |
| 9         | W06H12.1.1_Stormo_2012, C53B7.5.7_Stormo_2012, Elemento_2005_motif_272 |

| Motif No. | Motif Match<br>(p-value < 1e <sup>-4</sup> and e-value < 0.5)                                                                                                         |
|-----------|-----------------------------------------------------------------------------------------------------------------------------------------------------------------------|
| 10        | C23H5.1.3_Stormo_2012, F09F7.7b.7_Stormo_2012                                                                                                                         |
| 11        | Elemento_2005_motif_260, Y44E3A.2.1_Stormo_2012, Elemento_2005_motif_151, F19H6.1.2_Stormo_2012, F36H9.4.7_Stormo_2012, K10B4.1.1_Stormo_2012, Elemento_2005_motif_56 |
| 12        | C26D10.1.9_Stormo_2012, B0511.14b.3_Stormo_2012, C23H3.1.8_Stormo_2012                                                                                                |
| 13        | F33D11.7.1_Stormo_2012, M199.1.4_Stormo_2012, C49C8.5.1_Stormo_2012, F35H10.4.2_Stormo_2012, Y73E7A.1a.7_Stormo_2012, PAR2.3b.1_Stormo_2012, M03F4.3a.4_Stormo_2012   |
| 14        | F56F11.1.9_Stormo_2012, F17A9.3.2_Stormo_2012, Elemento_2005_motif_111, R13H4.7.7_Stormo_2012                                                                         |
| 15        | F34H10.2.6_Stormo_2012, C52B9.3b.7_Stormo_2012                                                                                                                        |
| 16        | No match                                                                                                                                                              |

| Motif No. | Motif Match<br>(p-value < 1e <sup>-4</sup> and e-value < 0.5)                                                                               |
|-----------|---------------------------------------------------------------------------------------------------------------------------------------------|
| 17        | Y71D11A.2b.7_Stormo_2012                                                                                                                    |
| 18        | ZC518.2.9_Stormo_2012                                                                                                                       |
| 19        | F22D6.10.2_Stormo_2012                                                                                                                      |
| 20        | T24C12.4.7_Stormo_2012                                                                                                                      |
| 21        | W03D2.9.1_Stormo_2012, R155.1a.8_Stormo_2012, B0205.4.9_Stormo_2012, F59F3.2.10_Stormo_2012                                                 |
| 22        | No match                                                                                                                                    |
| 23        | Y49C4A.4.3_Stormo_2012, F55G1.1.7_Stormo_2012, C23H5.1.1_Stormo_2012                                                                        |
| 24        | F42H10.3.3_Stormo_2012, F52F10.5.6_Stormo_2012, C49C8.5.1_Stormo_2012, W04C9.6.7_Stormo_2012, C40C9.2.10_Stormo_2012, R12A1.3.4_Stormo_2012 |

| Motif No. | Motif Match<br>(p-value < 1e <sup>-4</sup> and e-value < 0.5)                                                                                                                                                |
|-----------|--------------------------------------------------------------------------------------------------------------------------------------------------------------------------------------------------------------|
| 25        | F13D12.2.1_Stormo_2012                                                                                                                                                                                       |
| 26        | F17H10.2a.3_Stormo_2012, Elemento_2005_motif_348                                                                                                                                                             |
| 27        | K01C8.6.1_Stormo_2012                                                                                                                                                                                        |
| 28        | No match                                                                                                                                                                                                     |
| 29        | F53B1.2.10_Stormo_2012, F31D5.3b.3_Stormo_2012, F35B3.5a.2_Stormo_2012, F35B3.5a.1_Stormo_2012                                                                                                               |
| 30        | Y40B10A.8.2_Stormo_2012, Zhao_et.al_2007_3, C23H5.1.1_Stormo_2012, F52E1.9.2_Stormo_2012, C47D12.3.1_Stormo_2012, F58A4.3.9_Stormo_2012, C25D7.5.3_Stormo_2012, C04F2.1.3_Stormo_2012, PAR2.3a.9_Stormo_2012 |

**Table S18.** Putative regulatory motif matches to Wormbase motifs.

| Network    | GO ID                                 | GO description                                        |
|------------|---------------------------------------|-------------------------------------------------------|
| Neural     | GO:0022008                            | neurogenesis                                          |
|            | GO:0048699                            | generation of neurons                                 |
|            | GO:0030182                            | neuron differentiation                                |
|            | GO:0048666                            | neuron development                                    |
|            | GO:0007399                            | nervous system development                            |
|            | GO:0045664                            | regulation of neuron differentiation                  |
|            | GO:0014016                            | neuroblast differentiation                            |
|            | GO:0050767                            | regulation of neurogenesis                            |
|            | GO:0048667                            | cell morphogenesis involved in neuron differentiation |
|            | GO:0048665                            | neuron fate specification                             |
|            | GO:0050769                            | positive regulation of neurogenesis                   |
|            | GO:0014017                            | neuroblast fate commitment                            |
|            | GO:0045666                            | positive regulation of neuron differentiation         |
|            | GO:0007409                            | axonogenesis                                          |
|            | GO:0050770                            | regulation of axonogenesis                            |
|            | GO:0007411                            | axon guidance                                         |
|            | GO:0061564                            | axon development                                      |
|            | GO:0033563                            | dorsal/ventral axon guidance                          |
| GO:0045773 | positive regulation of axon extension |                                                       |

| Network | GO ID      | GO description                                                   |
|---------|------------|------------------------------------------------------------------|
| Embryo  | GO:0045995 | regulation of embryonic development                              |
|         | GO:0048598 | embryonic morphogenesis                                          |
|         | GO:0007369 | gastrulation                                                     |
|         | GO:0001704 | formation of primary germ layer                                  |
|         | GO:0042074 | cell migration involved in gastrulation                          |
|         | GO:0060795 | cell fate commitment involved in formation of primary germ layer |
|         | GO:0016055 | Wnt signaling pathway                                            |
|         | GO:0007509 | mesoderm migration involved in gastrulation                      |

| Network | GO ID      | GO description                   |
|---------|------------|----------------------------------|
| Muscle  | GO:0055001 | muscle cell development          |
|         | GO:0042692 | muscle cell differentiation      |
|         | GO:0007517 | muscle organ development         |
|         | GO:0055002 | striated muscle cell             |
|         | GO:0030017 | sarcomere                        |
|         | GO:0030016 | myofibril                        |
|         | GO:0043292 | contractile fiber part           |
|         | GO:0043292 | contractile fiber                |
|         | GO:0061061 | muscle structure development     |
|         | GO:0046716 | muscle cell cellular homeostasis |
|         | GO:0006936 | muscle contraction               |
|         | GO:0042692 | muscle cell differentiation      |
|         | GO:0055002 | striated muscle cell development |
|         | GO:0006941 | striated muscle contraction      |

**Table S19.** GO terms IDs used for the motif-associated GO term networks.

### DNA libraries used for genome assembly

| Species               | DNA or RNA | Developmental stage | Library type | Paired or single end reads | Read length (bp) | Sequencer                    | Insert length (bp) | No. of reads (Million) |
|-----------------------|------------|---------------------|--------------|----------------------------|------------------|------------------------------|--------------------|------------------------|
| <i>S. carpocapsae</i> | DNA        | IJ                  | regular      | paired                     | 75               | Illumina Genome Analyzer Iix | 400                | 85.76                  |
| <i>S. carpocapsae</i> | DNA        | IJ                  | regular      | paired                     | 100              | Illumina Genome Analyzer Iix | 350                | 103.09                 |
| <i>S. carpocapsae</i> | DNA        | IJ                  | jumping      | paired                     | 100              | Illumina HiSeq2000           | 1800               | 131.59                 |
| <i>S. feltiae</i>     | DNA        | IJ                  | regular      | paired                     | 75               | Illumina Genome Analyzer Iix | 500                | 80.41                  |
| <i>S. feltiae</i>     | DNA        | IJ                  | regular      | paired                     | 100              | Illumina HiSeq2000           | 450                | 75.94                  |
| <i>S. glaseri</i>     | DNA        | IJ                  | regular      | paired                     | 75               | Illumina Genome Analyzer Iix | 400                | 78.51                  |
| <i>S. monticolum</i>  | DNA        | IJ                  | regular      | paired                     | 75               | Illumina Genome Analyzer Iix | 390                | 108.61                 |
| <i>S. scapterisci</i> | DNA        | IJ                  | regular      | paired                     | 75               | Illumina Genome Analyzer Iix | 390                | 101.64                 |
| <i>S. scapterisci</i> | DNA        | IJ                  | regular      | paired                     | 100              | Illumina HiSeq2000           | 340                | 97.54                  |

**Table S20.** DNA library statistics for five *Steinernema* species.

### RNA-seq libraries used for genome annotation

| Species               | DNA or RNA | Developmental stage | Stranded or unstranded | Paired or single end reads | Read length (bp) | Sequencer                    | Insert length (bp) | No. of reads (Million) |
|-----------------------|------------|---------------------|------------------------|----------------------------|------------------|------------------------------|--------------------|------------------------|
| <i>S. carpocapsae</i> | RNA        | embryo              | unstranded             | paired                     | 75               | Illumina Genome Analyzer IIx | 200                | 54.94                  |
| <i>S. carpocapsae</i> | RNA        | L1                  | unstranded             | paired                     | 75               | Illumina Genome Analyzer IIx | 200                | 65.96                  |
| <i>S. carpocapsae</i> | RNA        | IJ                  | unstranded             | paired                     | 75               | Illumina Genome Analyzer IIx | 200                | 70.57                  |
| <i>S. carpocapsae</i> | RNA        | adult               | unstranded             | paired                     | 75               | Illumina Genome Analyzer IIx | 200                | 69.39                  |
| <i>S. feltiae</i>     | RNA        | IJ                  | unstranded             | paired                     | 75               | Illumina Genome Analyzer IIx | 200                | 87.99                  |
| <i>S. glaseri</i>     | RNA        | IJ                  | unstranded             | paired                     | 75               | Illumina Genome Analyzer IIx | 200                | 80.00                  |
| <i>S. monticolum</i>  | RNA        | IJ                  | unstranded             | paired                     | 75               | Illumina Genome Analyzer IIx | 200                | 95.74                  |
| <i>S. scapterisci</i> | RNA        | IJ                  | unstranded             | paired                     | 75               | Illumina Genome Analyzer IIx | 200                | 83.83                  |

**Table S21.** RNA library statistics for genome annotation.

|                                        | <i>carpocapsae</i> | <i>scapterisci</i> | <i>feltiae</i> | <i>glaseri</i> | <i>monticolum</i> |
|----------------------------------------|--------------------|--------------------|----------------|----------------|-------------------|
| Augustus genes                         | 28,313             | 31,378             | 33,459         | 34,143         | 36,007            |
| Augustus transcripts                   | 31,944             | 33,149             | 36,434         | 37,119         | 38,381            |
| Additional novel Cufflinks genes       | 508                | 693                | 745            | 744            | 1,090             |
| Additional novel Cufflinks transcripts | 6,546              | 5,818              | 7,580          | 8,779          | 6,830             |

**Table S22.** Numbers of genes and transcripts that were predicted by Augustus for all *Steinernema* species, and numbers of novel genes and transcripts that were discovered with RNA-seq data sets using Cufflinks. Four RNA-seq data sets (embryo, L1, IJ, and adult) were used for novel gene and transcript finding for *S. carpocapsae*, while only an IJ-stage RNA-seq data set was using for all the other species.
